# Supplementary material for: Growth of D614G Virus : Morgan – Morgan – Finney&nbsp;( MMF ) Regression&nbsp;
Source: Research Square preprint supplement (doi:10.21203/rs.3.rs-92776/v2), 2021-02-15
Supplement: Supplementary file 1 [file 4322613644cd2c43ca17fb20.docx]

SUPPLIMENDARY INFORMATIONS –**Growth of D614G Virus – Regression Analysis**

Jaydip Datta

**__________________________________________________________________________________**

Figure-I (Plot of Scattered Data of freq D614G vs Number of Months )


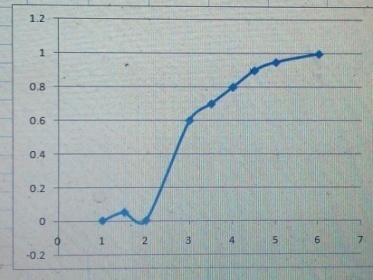


Figure – II ( Curve Finder –v.1.4 ) – Regression Analysis


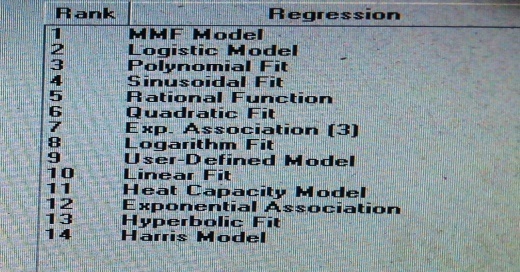


Figure –III( MMF Model Fit)


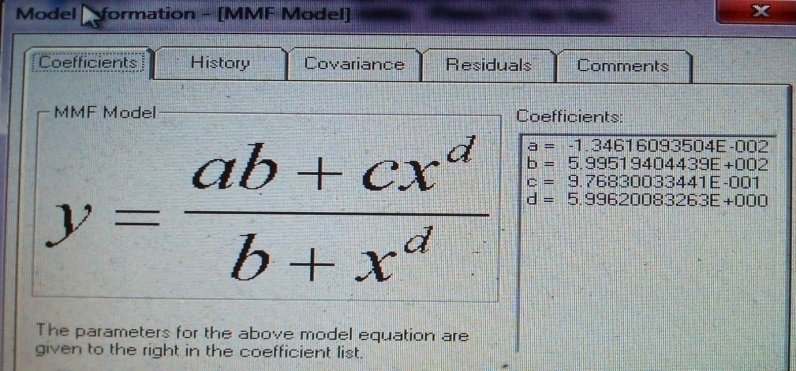


Figure – IV( 4 th Order Polynomial Fit )


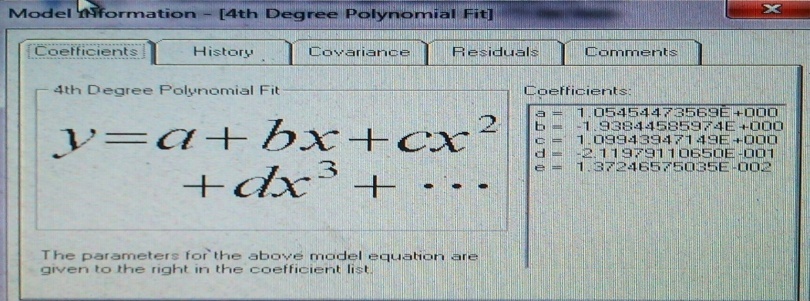


Figure – V (Covariance Matrix – 4x 4 )


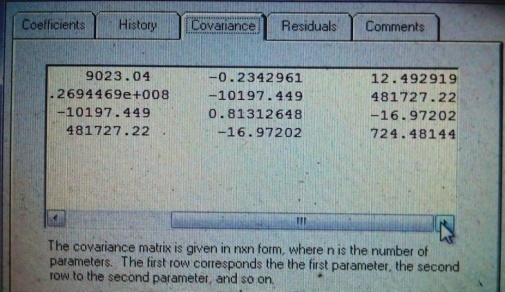


Figure – VI ( Chi-sq Hypothesis )


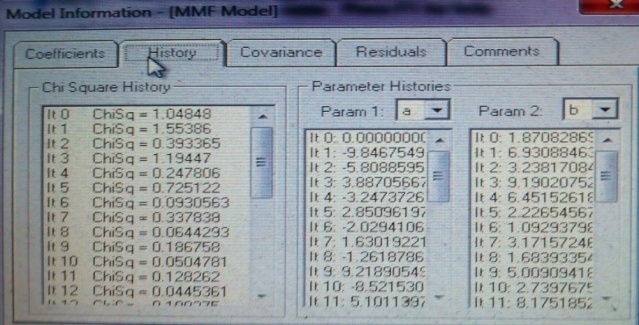


Figure – VII (Covariance Matrix – 5 x 5 )


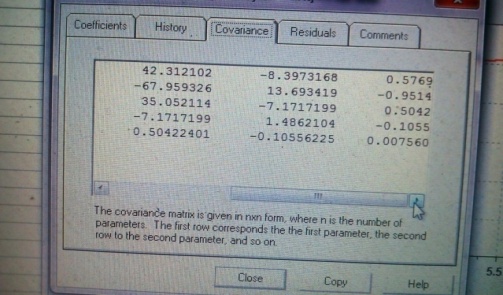

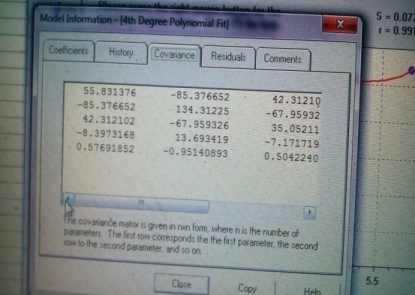


Figure –VIII( 4th Degree Polynomial Fit – r and s value )


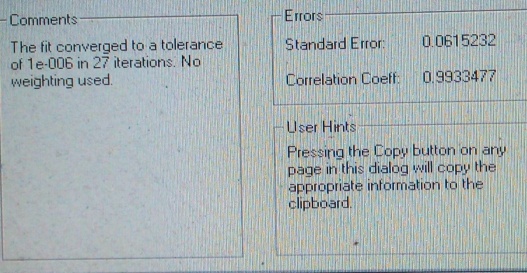


Figure – IX


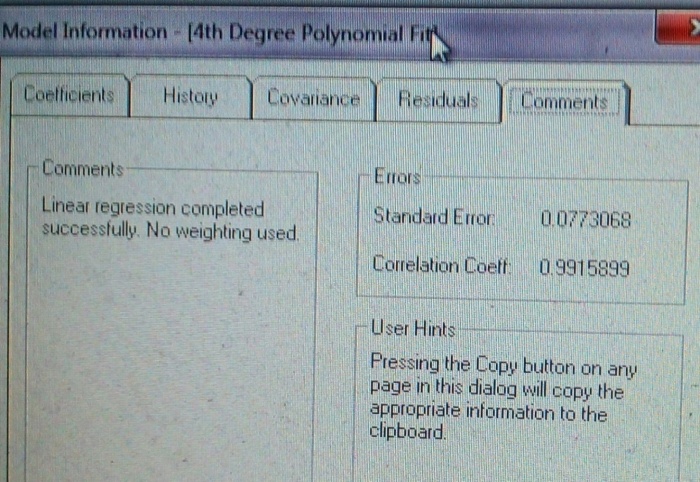


**Figure – X** ( 2x 2 Matrix )

Dataset (Bioenergetics data of DEL2G in Kcal /mole) of D614G , N501Y

([*https://zenodo.org/record/4514192*](https://zenodo.org/record/4514192) )

**Figure – XI**  ( Exponential fit – r and s value )


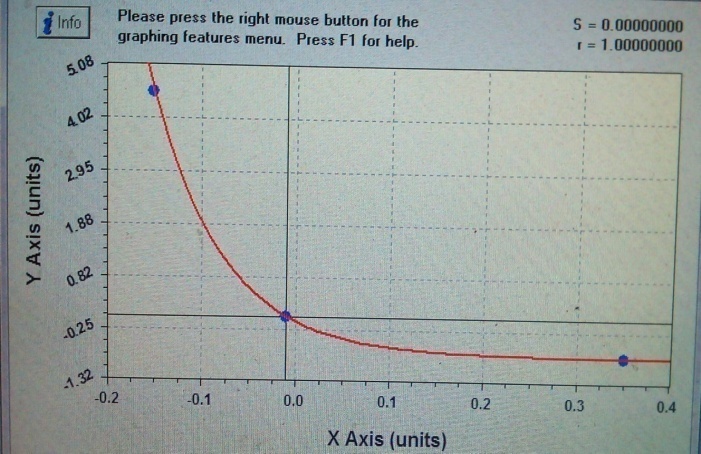


.

|  |  |
| --- | --- |

|  |
| --- |
